# Supplementary material for: Sex steroid levels in corresponding cerebrospinal fluid and serum samples quantified by mass spectrometry in men
Source: PubMed Central journal article supplement (PMC10762557; doi:10.1530/ec-23-0250), 2023-12-14
Supplement: supplementary_material.pdf [file supplementary_material.pdf]

## Supplementals

|                   | <i>Present study</i> | <i>Bea et al</i><br>60-80 years |
|-------------------|----------------------|---------------------------------|
| <b>T</b> (pg/ml)  | 4370±1610            | 1834-7585                       |
| <b>E2</b> (pg/ml) | 20.5±6.25            | <44.4                           |
| <b>4D</b> (pg/ml) | 774±259              | 263-1366                        |
| <b>P</b> (pg/ml)  | 77.0±9.51            | <223                            |

**Supplemental Table 1.** Comparison between serum sex steroid measurements in the present study and reference values in men published by Bae *et al* recalculated to pg/mL (1). T stands for testosterone; E2, estradiol; 4D, androstenedione and P, progesterone.

|             | <i>DHT</i> | <i>T</i> | <i>E1</i> | <i>E2</i> | <i>DHEA</i> | <i>4D</i> |
|-------------|------------|----------|-----------|-----------|-------------|-----------|
| <i>DHT</i>  |            |          |           |           |             |           |
| <i>T</i>    | 0.84***    |          |           |           |             |           |
| <i>E1</i>   | 0.02       | 0.04     |           |           |             |           |
| <i>E2</i>   | 0.51***    | 0.58***  | 0.49***   |           |             |           |
| <i>DHEA</i> | -0.04      | 0.06     | 0.19      | -0.08     |             |           |
| <i>4D</i>   | 0.04       | 0.13     | 0.39**    | 0.07      | 0.58***     |           |
| <i>P</i>    | -0.06      | -0.08    | -0.07     | 0.00      | -0.06       | -0.02     |

**Supplemental Table 2.** Pearson's correlations between serum steroids in men (n=47). DHT stands for dihydrotestosterone, T; testosterone, E1; estrone, E2; estradiol, DHEA; dehydroepiandrosterone, 4D; androstenedione and P; progesterone. \* p< 0.05; \*\* p< 0.01; \*\*\* p< 0.001

|             | <i>Calibrator stocks (µg/mL)</i> | <i>Level 1 (pg/mL)</i> | <i>Level 2 (pg/mL)</i> | <i>Level 3 (pg/mL)</i> | <i>Level 4 (pg/mL)</i> | <i>Level 5 (pg/mL)</i> | <i>Level 6 (pg/mL)</i> | <i>Level 7 (pg/mL)</i> | <i>R2</i> |
|-------------|----------------------------------|------------------------|------------------------|------------------------|------------------------|------------------------|------------------------|------------------------|-----------|
| <i>E2</i>   | 80                               | 800                    | 120                    | 16                     | 8                      | 2                      | 1                      | 0.5                    | >0.999    |
| <i>E1</i>   | 80                               | 800                    | 120                    | 16                     | 8                      | 2                      | 1                      | 0.5                    | >0.999    |
| <i>DHT</i>  | 200                              | 2 000                  | 300                    | 40                     | 20                     | 5                      | 2.5                    | 1.25                   | >0.999    |
| <i>4D</i>   | 500                              | 5 000                  | 750                    | 100                    | 50                     | 12.5                   | x                      | x                      | >0.999    |
| <i>T</i>    | 500                              | 10 000                 | 1 500                  | 200                    | 100                    | 25                     | 12.5                   | 6.25                   | >0.999    |
| <i>DHEA</i> | 200                              | 20 000                 | 3 000                  | 400                    | 200                    | 50                     | 25                     | x                      | >0.999    |
| <i>P</i>    | 200                              | 20 000                 | 3 000                  | 400                    | 200                    | 50                     | 25                     | 12.5                   | >0.999    |

**Supplemental Table 3.** Calibrator stocks, calibrator dilutions and calibrator standards used in CSF measurements. For serum measurements, levels are multiplied with the factor 1.8 as 250 µL was used for serum measurements and 450 µL for CSF measurements.

Seven different calibrator stocks, one for each steroid hormone, were made in ethyl acetate. The calibrator stocks were used to make seven calibrator dilutions (1:100), one for each steroid hormone. The seven different calibrator dilutions were pooled and diluted with methanol 1:100 to achieve calibrator level 1. Level 2 was 7.5:50 of level 1, level 3 was 1:50 of level 1, level 4 was 1:100 of level 1, level 5 was 0.835:50 of level 2, level 6 was 0.835:100 of level 2, and level 7 was 0.835:200 of level 2. On the day of analysis, calibrator samples were made by spiking water with 45µL of each calibrator level. The calibrator concentrations for CSF measurements are shown in the table are after this final 1:10 dilution step (45:450).

For some steroids, the lowest calibrator points were not used as they were below the LLOQ, denoted with x in the table.

All calibrator stocks, dilutions and solutions were stored at -80°C and will be stable for at least 5 years at this temperature. Between experiments, calibrator levels were kept at +4°C, normally for maximal four weeks. Calibrator levels are stable for up to 2 months at +4°C.

DHT stands for dihydrotestosterone, T; testosterone, E1; estrone, E2; estradiol, DHEA; dehydroepiandrosterone, 4D; androstenedione and P; progesterone. R2 is the linear correlation coefficient for a representative calibration curve.

| <i>Internal standard</i>              | <i>Concentration (pg/mL)</i> |
|---------------------------------------|------------------------------|
| <i>DHT-<sup>13</sup>C<sub>3</sub></i> | 400                          |
| <i>T-<sup>13</sup>C<sub>3</sub></i>   | 20 000                       |
| <i>E1-<sup>13</sup>C<sub>3</sub></i>  | 400                          |
| <i>E2-<sup>13</sup>C<sub>3</sub></i>  | 800                          |
| <i>DHEA-D<sub>6</sub></i>             | 20 000                       |
| <i>4D-<sup>13</sup>C<sub>3</sub></i>  | 10 000                       |
| <i>P-<sup>13</sup>C<sub>3</sub></i>   | 100 000                      |

**Supplemental Table 4.** Concentrations of internal standards in spike solution. Prior sample preparation, 50µL of the solution was spiked to the sample. DHT stands for dihydrotestosterone, T; testosterone, E1; estrone, E2; estradiol, DHEA; dehydroepiandrosterone, 4D; androstenedione and P; progesterone.

|                    | <i>Serum</i><br><i>pg/mL</i> | <i>CSF</i><br><i>pg/mL</i> |
|--------------------|------------------------------|----------------------------|
| <b><i>DHT</i></b>  | 373 (101-780)                | 1.61 (1.50-5.30)           |
| <b><i>T</i></b>    | 4464 (1315-7545)             | 45.7 (14.0-104)            |
| <b><i>E1</i></b>   | 31.2 (14.3-74.0)             | 0.88 (0.88-1.83)           |
| <b><i>E2</i></b>   | 18.7 (9.44-35.9)             | 0.59 (0.25-1.88)           |
| <b><i>DHEA</i></b> | 2868 (550-5300)              | 67.6 (41.2-163.2)          |
| <b><i>4D</i></b>   | 732 (368-1440)               | 55.2 (23.4-210)            |
| <b><i>P</i></b>    | 74 (74-134)                  | <LLOQ                      |

**Supplemental Table 5: Median sex steroid levels in serum and CSF of men (n=47).** Levels are shown as medians (range). DHT stands for dihydrotestosterone, T; testosterone, E1; estrone, E2; estradiol, DHEA; dehydroepiandrosterone, 4D; androstenedione and P; progesterone.

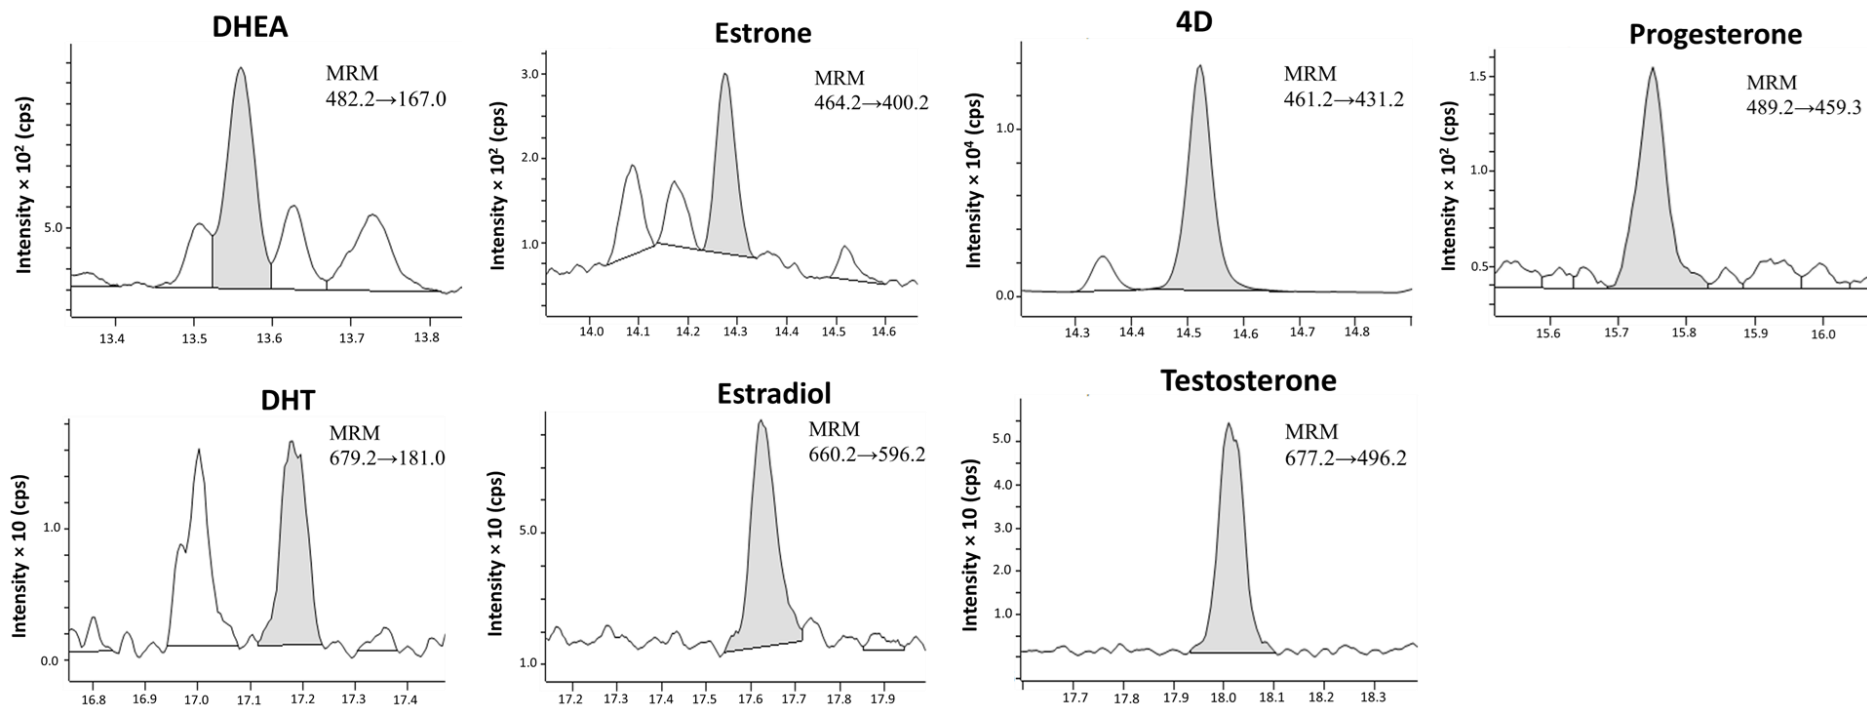

**Supplement Figure 1.** Representative extracted ion chromatograms in CSF for following steroids and their concentrations: Dehydroepiandrosterone (DHEA), 147 pg/mL; estrone (E1), 2.6 pg/mL; androstenedione (4D), 122 pg/mL; progesterone, 4.5 pg/mL; dihydrotestosterone (DHT), 7.0 pg/mL; estradiol (E2), 1,7 pg/mL; testosterone (T), 58 pg/mL.

## References

1. Bae YJ, Zeidler R, Baber R, Vogel M, Wirkner K, Loeffler M, Ceglarek U, Kiess W, Korner A, Thiery J, Kratzsch J. Reference intervals of nine steroid hormones over the life-span analyzed by LC-MS/MS: Effect of age, gender, puberty, and oral contraceptives. *The Journal of steroid biochemistry and molecular biology*. 2019;193:105409.
